# Supplementary material for: Risk-Based Evaluation of Total Petroleum Hydrocarbons in Vapor Intrusion Studies
Source: Int J Environ Res Public Health. 2013 Jun 13;10(6):2441–67. doi: 10.3390/ijerph10062441 (PMC3717746; doi:10.3390/ijerph10062441)
Supplement: Supplementary File 1 — Supplementary (XLSX, 81 KB) [file ijerph-10-02441-s001.xlsx]

## Sheet: TPH-B Ratios Unsorted
	Supplement: Summary of USEPA Petroleum Vapor Intrusion database samples for gasoline-only sites with TPH >1,000 µg/m3 [31].
	(Write-protection password: TPH)
	Site Count	Site ID	Sample Count	Sample ID	Site Type	TPH µg/m3	Benzene (µg/m3)	TPH:Benzene
	1	402	1	2579	UST	25000	900	27.7778
		402	2	2582	UST	28000000	200000	140
	2	409	3	2849	UST	46000	2600	17.6923
		409	4	2850	UST	3600	140	25.7143
		409	5	2851	UST	1700	100	17
		409	6	2852	UST	1000	16	62.5
		409	7	2853	UST	25000	940	26.5957
		409	8	2854	UST	1200	7.1	169.014
		409	9	2855	UST	4000	49	81.6327
		409	10	2856	UST	53000	8100	6.54321
	3	410	11	2875	UST	8250	18.2	453.297
		410	12	2876	UST	2860	2.8	1021.43
		410	13	2879	UST	4080	27	151.111
	4	411	14	2881	UST	4340	12	361.667
		411	15	2882	UST	1300	2.7	481.481
		411	16	2883	UST	1430	8.12	176.108
		411	17	2884	UST	3260	7.47	436.412
	5	412	18	2885	UST	3780	37	102.162
		412	19	2888	UST	7210	37	194.865
		412	20	2889	UST	43400	40	1085
	6	413	21	2891	UST	139000	150	926.667
		413	22	2892	UST	15600	18.2	857.143
		413	23	2894	UST	64700	84.4	766.588
		413	24	2895	UST	12600	12	1050
	7	414	25	2898	UST	3950	25	158
		414	26	2900	UST	5210	25	208.4
		414	27	2901	UST	4340	25.3	171.542
	8	415	28	2903	UST	265000	1430	185.315
		415	29	2904	UST	2820	5.2	542.308
		415	30	2907	UST	130000	422	308.057
	9	416	31	2910	UST	781000	182	4291.21
	10	417	32	2915	UST	1650	20.5	80.4878
		417	33	2918	UST	5990	24.4	245.492
		417	34	2919	UST	8290	34.1	243.109
		417	35	2921	UST	38400	61.4	625.407
		417	36	2922	UST	46900	0.1	469000
		417	37	2924	UST	10500	0.1	105000
		417	38	2925	UST	3290	15.6	210.897
		417	39	2927	UST	4730	23.1	204.762
		417	40	2928	UST	2740	14.6	187.671
	11	418	41	2929	UST	1780000	10700	166.355
		418	42	2932	UST	5210	0.1	52100
	12	419	43	2935	UST	2730	45	60.6667
		419	44	2936	UST	1170000	6170	189.627
	13	420	45	2941	UST	43200	46.1	937.093
		420	46	2942	UST	456000	270	1688.89
		420	47	2944	UST	120000	487	246.407
		420	48	2945	UST	318000	100	3180
	14	421	49	2947	UST	1130000	360	3138.89
		421	50	2948	UST	9980000	9090	1097.91
		422	51	2954	UST	3950	25	158
		422	52	2956	UST	5210	24	217.083
		422	53	2957	UST	4340	25.3	171.542
	15	423	54	2959	UST	2690	25	107.6
		423	55	2960	UST	3950	35.7	110.644
		423	56	2962	UST	2910	26	111.923
		423	57	2963	UST	3990	39	102.308
	16	424	58	2966	UST	1040	4.22	246.445
		424	59	2968	UST	1740	5.2	334.615
		424	60	2969	UST	1300	52	25
	17	425	61	2972	UST	2650	3.25	815.385
	18	426	62	2977	UST	5720	17.6	325
		426	63	2978	UST	354000	47.9	7390.4
		426	64	2980	UST	2130	4.79	444.676
	19	427	65	2982	UST	16500	52	317.308
		427	66	2983	UST	21700	150	144.667
		427	67	2985	UST	7810	42	185.952
	20	428	68	2986	UST	18200000	455000	40
		428	69	2987	UST	14300000	312000	45.8333
		428	70	2989	UST	9800	79	124.051
	21	429	71	2992	UST	25100	45	557.778
		429	72	2993	UST	75500	45	1677.78
		429	73	2995	UST	248000	45	5511.11
		429	74	2996	UST	1630	12	135.833
	22	430	75	2998	UST	6100	450	13.5556
		430	76	2999	UST	174000	2830	61.4841
		430	77	3000	UST	7400	550	13.4545
		430	78	3001	UST	7400	550	13.4545
	23	431	79	3002	UST	6940	42	165.238
		431	80	3003	UST	3780	52	72.6923
		431	81	3005	UST	73800	45	1640
	24	436	82	3093	UST	100000	480	208.333
		436	83	3094	UST	210000	880	238.636
		436	84	3095	UST	100000000	270000	370.37
		436	85	3097	UST	160000	530	301.887
		436	86	3098	UST	110000000	210000	523.81
		436	87	3099	UST	74000	4.3	17209.3
		436	88	3100	UST	20000000	1000	20000
		436	89	3102	UST	490000	80	6125
		436	90	3103	UST	35000000	1300	26923.1
	25	437	91	3104	Terminal	540000	200	2700
		437	92	3105	Terminal	4500000	500	9000
		437	93	3106	Terminal	57000000	380000	150
		437	94	3108	Terminal	43000000	480000	89.5833
	26	438	95	3110	UST	13000000	10000	1300
		438	96	3111	UST	15000000	11000	1363.64
		438	97	3112	UST	11000000	15000	733.333
	27	439	98	3116	UST	270000	280	964.286
		439	99	3118	UST	1700000	800	2125
		439	100	3119	UST	110000000	91000	1208.79
		439	101	3121	UST	180000000	140000	1285.71
	28	440	102	3127	UST	1390	3.19	435.737
	29	440	103	3128	UST	3570	3.19	1119.12
		440	104	3129	UST	5290	1	5290
		440	105	3130	UST	258000	2300	112.174
		440	106	3131	UST	1800000	16700	107.784
		440	107	3132	UST	18100000	145000	124.828
	29	441	108	3143	UST	15000	140	107.143
		441	109	3145	UST	3700	54	68.5185
		441	110	3146	UST	15000	61	245.902
		441	111	3150	UST	270000	140	1928.57
		441	112	3154	UST	140000	2.7	51851.9
		441	113	3155	UST	27000	6.1	4426.23
	30	442	114	3158	UST	3600	6.9	521.739
		442	115	3159	UST	1800	4.5	400
		442	116	3160	UST	3300	6.5	507.692
		442	117	3161	UST	3700	5.5	672.727
		442	118	3162	UST	9200	12	766.667
		442	119	3164	UST	21000	22	954.545
		442	120	3165	UST	15000	21	714.286
	31	444	121	3219	UST	8000000	87000	91.954
		444	122	3220	UST	30300000	280000	108.214
		444	123	3221	UST	105000000	950000	110.526
		444	124	3222	UST	170000000	960000	177.083
		444	125	3223	UST	71700000	28000	2560.71
		444	126	3224	UST	63800000	270000	236.296
		444	127	3225	UST	245000000	1900000	128.947
		444	128	3226	UST	383000000	5200000	73.6538
		444	129	3227	UST	8400000	220000	38.1818
		444	130	3228	UST	130000000	1200000	108.333
		444	131	3229	UST	130000000	1300000	100
		444	132	3230	UST	110000000	900000	122.222
		444	133	3231	UST	15000000	240000	62.5
		444	134	3232	UST	7810	10	781
		444	135	3233	UST	29000000	1300000	22.3077
		444	136	3234	UST	290000000	3700000	78.3784
		444	137	3235	UST	1540000	18000	85.5556
		444	138	3236	UST	63100000	610000	103.443
		444	139	3237	UST	62700000	540000	116.111
		444	140	3238	UST	77500000	770000	100.649
		444	141	3239	UST	718000	2000	359
		444	142	3240	UST	119000000	440000	270.455
		444	143	3241	UST	162000000	1400000	115.714
		444	144	3242	UST	40200000	330000	121.818
		444	145	3243	UST	11800	72	163.889
		444	146	3244	UST	879000	200	4395
		444	147	3245	UST	355000	980	362.245
		444	148	3246	UST	1020000	3400	300
		444	149	3249	UST	49000	410	119.512
		444	150	3251	UST	2800	51	54.902
		444	151	3252	UST	70000	570	122.807
		444	152	3255	UST	29000	11	2636.36
		444	153	3257	UST	11800	140	84.2857
		444	154	3258	UST	8700000	1000	8700
		444	155	3260	UST	7800	3	2600
		444	156	3261	UST	22900000	35000	654.286
		444	157	3264	UST	17000	190	89.4737
		444	158	3266	UST	1600	22	72.7273
		444	159	3267	UST	12000	87	137.931
		444	160	3272	UST	4000	29	137.931
		444	161	3273	UST	4000	80	50
		444	162	3274	UST	4000	15	266.667
		444	163	3275	UST	22000	470	46.8085
		444	164	3276	UST	4000	8	500
		444	165	3277	UST	35900	69	520.29
		444	166	3278	UST	5000	150	33.3333
		444	167	3279	UST	19000	570	33.3333
		444	168	3280	UST	2000	20	100
		444	169	3281	UST	6000	22	272.727
		444	170	3282	UST	2000	25	80
		444	171	3283	UST	768000	13000	59.0769
		444	172	3285	UST	4000	160	25
		444	173	3286	UST	12000	280	42.8571
		444	174	3287	UST	7800	53	147.17
		444	175	3288	UST	5850000	50000	117
		444	176	3293	UST	26000000	230000	113.043
		444	177	3298	UST	33000000	260000	126.923
		444	178	3303	UST	17000000	140000	121.429
		444	179	3308	UST	5800000	11000	527.273
		444	180	3310	UST	106000	12	8833.33
		444	181	3311	UST	885000	200	4425
		444	182	3312	UST	4000	12	333.333
		444	183	3313	UST	76000	380	200
		444	184	3314	UST	8800	0.7	12571.4
		444	185	3315	UST	6000	68	88.2353
		444	186	3316	UST	4000	52	76.9231
		444	187	3317	UST	4000	720	5.55556
		444	188	3318	UST	4600	77	59.7403
		444	189	3320	UST	4000	22	181.818
		444	190	3324	UST	32000000	94000	340.426
		444	191	3325	UST	28800000	240000	120
		444	192	3326	UST	15400	19	810.526
		444	193	3327	UST	33200	450	73.7778
		444	194	3328	UST	32600000	110000	296.364
		444	195	3329	UST	42000000	470000	89.3617
		444	196	3331	UST	160000	5800	27.5862
		444	197	3332	UST	13000000	360000	36.1111
		444	198	3333	UST	34000000	1100000	30.9091
		444	199	3335	UST	8400000	190000	44.2105
		444	200	3336	UST	27000000	720000	37.5
		444	201	3337	UST	11000000	2400000	4.58333
		444	202	3339	UST	3200000	85000	37.6471
		444	203	3340	UST	21000000	540000	38.8889
		444	204	3341	UST	66000000	1500000	44
		444	205	3342	UST	1300	5.7	228.07
		444	206	3343	UST	1700000	2600	653.846
		444	207	3344	UST	11000000	110000	100
		444	208	3345	UST	18000000	700000	25.7143
		444	209	3346	UST	46000	430	106.977
		444	210	3347	UST	158000000	230000	686.957
		444	211	3348	UST	125000000	600000	208.333
		444	212	3349	UST	130000	2200	59.0909
		444	213	3350	UST	110000000	990000	111.111
		444	214	3351	UST	32500000	810000	40.1235
		444	215	3352	UST	120000	1700	70.5882
		444	216	3353	UST	62000000	560000	110.714
		444	217	3354	UST	56000000	1100000	50.9091
		444	218	3355	UST	20000000	250000	80
		444	219	3356	UST	100000000	490000	204.082
		444	220	3357	UST	200000000	4600000	43.4783
		444	221	3358	UST	13800	254	54.3307
		444	222	3359	UST	19000000	250000	76
		444	223	3360	UST	73000000	840000	86.9048
		444	224	3361	UST	71000000	1700000	41.7647
		444	225	3362	UST	4500000	4200	1071.43
		444	226	3363	UST	36000000	11000	3272.73
		444	227	3364	UST	23000000	770000	29.8701
	32	446	228	3370	UST	39000	1.9	20526.3
		446	229	3371	UST	36000	4.4	8181.82
		446	230	3372	UST	40000	7.1	5633.8
		446	231	3373	UST	27000	0.87	31034.5
		446	232	3374	UST	28000	7.1	3943.66
		446	233	3375	UST	28000	12	2333.33
		446	234	3376	UST	7000	4.6	1521.74
		446	235	3379	UST	90000	4.9	18367.3
		446	236	3380	UST	36000	1.6	22500
		446	237	3381	UST	38000	8.1	4691.36
		446	238	3382	UST	34000	13	2615.38
		446	239	3383	UST	25000	2.1	11904.8
		446	240	3384	UST	30000	10	3000
		446	241	3385	UST	31000	25	1240
		446	242	3389	UST	61000	5.4	11296.3
		446	243	3390	UST	44000	2.8	15714.3
		446	244	3391	UST	37000	5.4	6851.85
		446	245	3392	UST	37000	4.7	7872.34
		446	246	3393	UST	29000	9.1	3186.81
		446	247	3394	UST	28000	3.7	7567.57
		446	248	3395	UST	30000	5.1	5882.35
		446	249	3396	UST	27000	1100	24.5455
		446	250	3399	UST	98000	4.2	23333.3
		446	251	3400	UST	40000	12	3333.33
		446	252	3401	UST	40000	110	363.636
		446	253	3402	UST	39000	270	144.444
		446	254	3403	UST	30000	3.3	9090.91
		446	255	3404	UST	28000	6.8	4117.65
		446	256	3405	UST	44000	37	1189.19
		446	257	3406	UST	43000	1.9	22631.6
		446	258	3407	UST	42000	2.4	17500
		446	259	3408	UST	41000	5.5	7454.55
		446	260	3409	UST	31000	0.85	36470.6
		446	261	3411	UST	30000	2.9	10344.8
		446	262	3415	UST	110000	5.2	21153.8
		446	263	3416	UST	39000	9.7	4020.62
		446	264	3417	UST	40000	17	2352.94
		446	265	3418	UST	39000	0.99	39393.9
		446	266	3419	UST	34000	2.5	13600
		446	267	3420	UST	35000	2.1	16666.7
		446	268	3421	UST	41000	9.7	4226.8
		446	269	3422	UST	38000	8.3	4578.31
		446	270	3423	UST	29000	0.68	42647.1
		446	271	3424	UST	28000	2.3	12173.9
		446	272	3425	UST	30000	5.3	5660.38
	33	449	273	3436	UST	940000	7800	120.513
		449	274	3437	UST	78000000	650000	120
		449	275	3438	UST	82000000	700000	117.143
		449	276	3439	UST	74000000	570000	129.825
		449	277	3443	UST	17000000	45000	377.778
		449	278	3444	UST	86000000	410000	209.756
		449	279	3445	UST	86000000	430000	200
		449	280	3446	UST	78000000	400000	195
		449	281	3449	UST	1800	4.2	428.571
		449	282	3450	UST	100000000	270000	370.37
		449	283	3451	UST	86000000	250000	344
		449	284	3452	UST	94000000	250000	376
		449	285	3453	UST	61000000	210000	290.476
	34	450	286	3455	UST	1400	3.9	358.974
		450	287	3458	UST	53000	13	4076.92
		450	288	3459	UST	70000	23	3043.48
		450	289	3460	UST	13000000	160000	81.25
		450	290	3461	UST	4100	4.3	953.488
		450	291	3462	UST	15000	4.2	3571.43
		450	292	3463	UST	2600000	9700	268.041
		450	293	3464	UST	1100	3.9	282.051
		450	294	3465	UST	3400	34	100
		450	295	3466	UST	1200000	310	3870.97
		450	296	3468	UST	1700	3.7	459.459
		450	297	3469	UST	1800	3.9	461.538
		450	298	3470	UST	65000	26	2500
		450	299	3471	UST	5700	7	814.286
		450	300	3472	UST	1000	7.2	138.889
		450	301	3473	UST	450000	500	900
		450	302	3474	UST	4900	4.3	1139.53
		450	303	3475	UST	2100	4	525
		450	304	3476	UST	13000	4.5	2888.89
		450	305	3479	UST	1100	3.9	282.051
		450	306	3481	UST	1500	3.9	384.615
		450	307	3488	UST	1500	4.1	365.854
		450	308	3495	UST	2600	4.2	619.048
		450	309	3496	UST	2600	9.4	276.596
		450	310	3497	UST	1100	10	110
		450	311	3507	UST	1600	5.2	307.692
		450	312	3517	UST	9800	9	1088.89
	35	452	313	3525	UST	2400	0.88	2727.27
		452	314	3534	UST	12000	0.27	44444.4
	36	452	315	3546	UST	2700	3.7	729.73
		454	316	3556	UST	1100000	1300	846.154
		454	317	3557	UST	17000000	14000	1214.29
		454	318	3559	UST	1300000	210	6190.48
		454	319	3560	UST	18000000	1700	10588.2
		454	320	3561	UST	8500000	1700	5000
	37	459	321	3775	UST	9800	34	288.235
		459	322	3777	UST	2135	98	21.7857
		459	323	3778	UST	7830000	85000	92.1176
		459	324	3780	UST	37000	700	52.8571
	38	460	325	3782	UST	13040	24	543.333
		460	326	3783	UST	2070	4	517.5
	39	461	327	3787	UST	1508	14	107.714
		461	328	3788	UST	3640	55	66.1818
		461	329	3789	UST	1230	34	36.1765
		461	330	3790	UST	1305	25	52.2
	40	463	331	3796	UST	1110	6.9	160.87
	41	464	332	3801	UST	2588	2	1294
		464	333	3802	UST	45480	20	2274
		464	334	3807	UST	1015	2	507.5
		464	335	3815	UST	2180	2	1090
		464	336	3816	UST	2016	2	1008
		464	337	3824	UST	16240	20	812
	42	465	338	3827	UST	26900000	70000	384.286
		465	339	3828	UST	4929300	20000	246.465
		465	340	3829	UST	31093000	6700	4640.75
		465	341	3831	UST	47990	2900	16.5483
		465	342	3832	UST	55620	43	1293.49
		465	343	3833	UST	1253000	4400	284.773
	43	466	344	3836	UST	6426	4.4	1460.45
		466	345	3837	UST	1530	44	34.7727
	44	467	346	3842	UST	11000	1300	8.46154
		467	347	3843	UST	35400	480	73.75
		467	348	3844	UST	163100	3200	50.9688
		467	349	3845	UST	3097000	110000	28.1545
		467	350	3848	UST	6990	200	34.95
	45	468	351	3856	UST	10360	2.9	3572.41
		468	352	3857	UST	5700	2	2850
	46	469	353	3861	UST	5190	7.9	656.962
		469	354	3863	UST	1369	8	171.125
		469	355	3864	UST	1950	6.5	300
	47	474	356	6384	UST	179086	10	17908.6
		474	357	6385	UST	1731000	5	346200
		474	358	6386	UST	414354	5	82870.9
		474	359	6387	UST	67803000	3000	22601
		474	360	6388	UST	113767000	127000	895.803
		474	361	6393	UST	397327	198	2006.7
	48	607	362	9203	UST	1114550	350	3184.43
		607	363	9204	UST	29200000	2000	14600
		607	364	9205	UST	37800000	10000	3780

## Sheet: TPH-B Ratios Sorted
	Supplement (cont.): Summary of USEPA Petroleum Vapor Intrusion database samples for gasoline-only sites with TPH >1,000 µg/m3 [31].
	(Write-protection password: TPH)
	Count	Site ID#	Sample ID#	Site Type	TPH (ug/m3)	Benzene (ug/m3)	TPH:Benzene
	1	444	3337	UST	11000000	2400000	4.58333
	2	444	3317	UST	4000	720	5.55556
	3	409	2856	UST	53000	8100	6.54321
	4	467	3842	UST	11000	1300	8.46154
	5	430	3000	UST	7400	550	13.4545
	6	430	3001	UST	7400	550	13.4545
	7	430	2998	UST	6100	450	13.5556
	8	465	3831	UST	47990	2900	16.5483
	9	409	2851	UST	1700	100	17
	10	409	2849	UST	46000	2600	17.6923
	11	459	3777	UST	2135	98	21.7857
	12	444	3233	UST	29000000	1300000	22.3077
	13	446	3396	UST	27000	1100	24.5455
	14	424	2969	UST	1300	52	25
	15	444	3285	UST	4000	160	25
	16	409	2850	UST	3600	140	25.7143
	17	444	3345	UST	18000000	700000	25.7143
	18	409	2853	UST	25000	940	26.5957
	19	444	3331	UST	160000	5800	27.5862
	20	402	2579	UST	25000	900	27.7778
	21	467	3845	UST	3097000	110000	28.1545
	22	444	3364	UST	23000000	770000	29.8701
	23	444	3333	UST	34000000	1100000	30.9091
	24	444	3278	UST	5000	150	33.3333
	25	444	3279	UST	19000	570	33.3333
	26	466	3837	UST	1530	44	34.7727
	27	467	3848	UST	6990	200	34.95
	28	444	3332	UST	13000000	360000	36.1111
	29	461	3789	UST	1230	34	36.1765
	30	444	3336	UST	27000000	720000	37.5
	31	444	3339	UST	3200000	85000	37.6471
	32	444	3227	UST	8400000	220000	38.1818
	33	444	3340	UST	21000000	540000	38.8889
	34	428	2986	UST	18200000	455000	40
	35	444	3351	UST	32500000	810000	40.1235
	36	444	3361	UST	71000000	1700000	41.7647
	37	444	3286	UST	12000	280	42.8571
	38	444	3357	UST	200000000	4600000	43.4783
	39	444	3341	UST	66000000	1500000	44
	40	444	3335	UST	8400000	190000	44.2105
	41	428	2987	UST	14300000	312000	45.8333
	42	444	3275	UST	22000	470	46.8085
	43	444	3273	UST	4000	80	50
	44	444	3354	UST	56000000	1100000	50.9091
	45	467	3844	UST	163100	3200	50.9688
	46	461	3790	UST	1305	25	52.2
	47	459	3780	UST	37000	700	52.8571
	48	444	3358	UST	13800	254	54.3307
	49	444	3251	UST	2800	51	54.902
	50	444	3283	UST	768000	13000	59.0769
	51	444	3349	UST	130000	2200	59.0909
	52	444	3318	UST	4600	77	59.7403
	53	419	2935	UST	2730	45	60.6667
	54	430	2999	UST	174000	2830	61.4841
	55	409	2852	UST	1000	16	62.5
	56	444	3231	UST	15000000	240000	62.5
	57	461	3788	UST	3640	55	66.1818
	58	441	3145	UST	3700	54	68.5185
	59	444	3352	UST	120000	1700	70.5882
	60	431	3003	UST	3780	52	72.6923
	61	444	3266	UST	1600	22	72.7273
	62	444	3226	UST	383000000	5200000	73.6538
	63	467	3843	UST	35400	480	73.75
	64	444	3327	UST	33200	450	73.7778
	65	444	3359	UST	19000000	250000	76
	66	444	3316	UST	4000	52	76.9231
	67	444	3234	UST	290000000	3700000	78.3784
	68	444	3282	UST	2000	25	80
	69	444	3355	UST	20000000	250000	80
	70	417	2915	UST	1650	20.5	80.4878
	71	450	3460	UST	13000000	160000	81.25
	72	409	2855	UST	4000	49	81.6327
	73	444	3257	UST	11800	140	84.2857
	74	444	3235	UST	1540000	18000	85.5556
	75	444	3360	UST	73000000	840000	86.9048
	76	444	3315	UST	6000	68	88.2353
	77	444	3329	UST	42000000	470000	89.3617
	78	444	3264	UST	17000	190	89.4737
	79	437	3108	Terminal	43000000	480000	89.5833	79
	80	444	3219	UST	8000000	87000	91.954
	81	459	3778	UST	7830000	85000	92.1176
	82	444	3229	UST	130000000	1300000	100
	83	444	3280	UST	2000	20	100
	84	444	3344	UST	11000000	110000	100
	85	450	3465	UST	3400	34	100
	86	444	3238	UST	77500000	770000	100.649
	87	412	2885	UST	3780	37	102.162
	88	423	2963	UST	3990	39	102.308
	89	444	3236	UST	63100000	610000	103.443
	90	444	3346	UST	46000	430	106.977
	91	441	3143	UST	15000	140	107.143
	92	423	2959	UST	2690	25	107.6
	93	461	3787	UST	1508	14	107.714
	94	440	3131	UST	1800000	16700	107.784
	95	444	3220	UST	30300000	280000	108.214
	96	444	3228	UST	130000000	1200000	108.333
	97	450	3497	UST	1100	10	110
	98	444	3221	UST	105000000	950000	110.526
	99	423	2960	UST	3950	35.7	110.644
	100	444	3353	UST	62000000	560000	110.714
	101	444	3350	UST	110000000	990000	111.111
	102	423	2962	UST	2910	26	111.923
	103	440	3130	UST	258000	2300	112.174
	104	444	3293	UST	26000000	230000	113.043
	105	444	3241	UST	162000000	1400000	115.714
	106	444	3237	UST	62700000	540000	116.111
	107	444	3288	UST	5850000	50000	117
	108	449	3438	UST	82000000	700000	117.143
	109	444	3249	UST	49000	410	119.512
	110	444	3325	UST	28800000	240000	120
	111	449	3437	UST	78000000	650000	120
	112	449	3436	UST	940000	7800	120.513
	113	444	3303	UST	17000000	140000	121.429
	114	444	3242	UST	40200000	330000	121.818
	115	444	3230	UST	110000000	900000	122.222
	116	444	3252	UST	70000	570	122.807
	117	428	2989	UST	9800	79	124.051
	118	440	3132	UST	18100000	145000	124.828
	119	444	3298	UST	33000000	260000	126.923
	120	444	3225	UST	245000000	1900000	128.947
	121	449	3439	UST	74000000	570000	129.825
	122	429	2996	UST	1630	12	135.833
	123	444	3267	UST	12000	87	137.931
	124	444	3272	UST	4000	29	137.931
	125	450	3472	UST	1000	7.2	138.889
	126	402	2582	UST	28000000	200000	140
	127	446	3402	UST	39000	270	144.444
	128	427	2983	UST	21700	150	144.667
	129	444	3287	UST	7800	53	147.17
	130	437	3106	Terminal	57000000	380000	150
	131	410	2879	UST	4080	27	151.111
	132	414	2898	UST	3950	25	158
	133	422	2954	UST	3950	25	158
	134	463	3796	UST	1110	6.9	160.87
	135	444	3243	UST	11800	72	163.889
	136	431	3002	UST	6940	42	165.238
	137	418	2929	UST	1780000	10700	166.355
	138	409	2854	UST	1200	7.1	169.014
	139	469	3863	UST	1369	8	171.125
	140	414	2901	UST	4340	25.3	171.542
	141	422	2957	UST	4340	25.3	171.542
	142	411	2883	UST	1430	8.12	176.108
	143	444	3222	UST	170000000	960000	177.083
	144	444	3320	UST	4000	22	181.818
	145	415	2903	UST	265000	1430	185.315
	146	427	2985	UST	7810	42	185.952
	147	417	2928	UST	2740	14.6	187.671
	148	419	2936	UST	1170000	6170	189.627
	149	412	2888	UST	7210	37	194.865
	150	449	3446	UST	78000000	400000	195
	151	444	3313	UST	76000	380	200
	152	449	3445	UST	86000000	430000	200
	153	444	3356	UST	100000000	490000	204.082
	154	417	2927	UST	4730	23.1	204.762
	155	436	3093	UST	100000	480	208.333
	156	444	3348	UST	125000000	600000	208.333
	157	414	2900	UST	5210	25	208.4
	158	449	3444	UST	86000000	410000	209.756
	159	417	2925	UST	3290	15.6	210.897
	160	422	2956	UST	5210	24	217.083
	161	444	3342	UST	1300	5.7	228.07
	162	444	3224	UST	63800000	270000	236.296
	163	436	3094	UST	210000	880	238.636
	164	417	2919	UST	8290	34.1	243.109
	165	417	2918	UST	5990	24.4	245.492
	166	441	3146	UST	15000	61	245.902
	167	420	2944	UST	120000	487	246.407
	168	424	2966	UST	1040	4.22	246.445
	169	465	3828	UST	4929300	20000	246.465
	170	444	3274	UST	4000	15	266.667
	171	450	3463	UST	2600000	9700	268.041
	172	444	3240	UST	119000000	440000	270.455
	173	444	3281	UST	6000	22	272.727
	174	450	3496	UST	2600	9.4	276.596
	175	450	3464	UST	1100	3.9	282.051
	176	450	3479	UST	1100	3.9	282.051
	177	465	3833	UST	1253000	4400	284.773
	178	459	3775	UST	9800	34	288.235
	179	449	3453	UST	61000000	210000	290.476
	180	444	3328	UST	32600000	110000	296.364
	181	444	3246	UST	1020000	3400	300
	182	469	3864	UST	1950	6.5	300
	183	436	3097	UST	160000	530	301.887
	184	450	3507	UST	1600	5.2	307.692
	185	415	2907	UST	130000	422	308.057
	186	427	2982	UST	16500	52	317.308
	187	426	2977	UST	5720	17.6	325
	188	444	3312	UST	4000	12	333.333
	189	424	2968	UST	1740	5.2	334.615
	190	444	3324	UST	32000000	94000	340.426
	191	449	3451	UST	86000000	250000	344
	192	450	3455	UST	1400	3.9	358.974
	193	444	3239	UST	718000	2000	359
	194	411	2881	UST	4340	12	361.667
	195	444	3245	UST	355000	980	362.245
	196	446	3401	UST	40000	110	363.636
	197	450	3488	UST	1500	4.1	365.854
	198	436	3095	UST	100000000	270000	370.37
	199	449	3450	UST	100000000	270000	370.37
	200	449	3452	UST	94000000	250000	376
	201	449	3443	UST	17000000	45000	377.778
	202	465	3827	UST	26900000	70000	384.286
	203	450	3481	UST	1500	3.9	384.615
	204	442	3159	UST	1800	4.5	400
	205	449	3449	UST	1800	4.2	428.571
	206	440	3127	UST	1390	3.19	435.737
	207	411	2884	UST	3260	7.47	436.412
	208	426	2980	UST	2130	4.79	444.676
	209	410	2875	UST	8250	18.2	453.297
	210	450	3468	UST	1700	3.7	459.459
	211	450	3469	UST	1800	3.9	461.538
	212	411	2882	UST	1300	2.7	481.481
	213	444	3276	UST	4000	8	500
	214	464	3807	UST	1015	2	507.5
	215	442	3160	UST	3300	6.5	507.692
	216	460	3783	UST	2070	4	517.5
	217	444	3277	UST	35900	69	520.29
	218	442	3158	UST	3600	6.9	521.739
	219	436	3098	UST	110000000	210000	523.81
	220	450	3475	UST	2100	4	525
	221	444	3308	UST	5800000	11000	527.273
	222	415	2904	UST	2820	5.2	542.308
	223	460	3782	UST	13040	24	543.333
	224	429	2992	UST	25100	45	557.778
	225	450	3495	UST	2600	4.2	619.048
	226	417	2921	UST	38400	61.4	625.407
	227	444	3343	UST	1700000	2600	653.846
	228	444	3261	UST	22900000	35000	654.286
	229	469	3861	UST	5190	7.9	656.962
	230	442	3161	UST	3700	5.5	672.727
	231	444	3347	UST	158000000	230000	686.957
	232	442	3165	UST	15000	21	714.286
	233	452	3546	UST	2700	3.7	729.73
	234	438	3112	UST	11000000	15000	733.333
	235	413	2894	UST	64700	84.4	766.588
	236	442	3162	UST	9200	12	766.667
	237	444	3232	UST	7810	10	781
	238	444	3326	UST	15400	19	810.526
	239	464	3824	UST	16240	20	812
	240	450	3471	UST	5700	7	814.286
	241	425	2972	UST	2650	3.25	815.385
	242	454	3556	UST	1100000	1300	846.154
	243	413	2892	UST	15600	18.2	857.143
	244	474	6388	UST	113767000	127000	895.803
	245	450	3473	UST	450000	500	900	166
	246	413	2891	UST	139000	150	926.667
	247	420	2941	UST	43200	46.1	937.093
	248	450	3461	UST	4100	4.3	953.488
	249	442	3164	UST	21000	22	954.545
	250	439	3116	UST	270000	280	964.286
	251	464	3816	UST	2016	2	1008
	252	410	2876	UST	2860	2.8	1021.43
	253	413	2895	UST	12600	12	1050
	254	444	3362	UST	4500000	4200	1071.43
	255	412	2889	UST	43400	40	1085
	256	450	3517	UST	9800	9	1088.89
	257	464	3815	UST	2180	2	1090
	258	421	2948	UST	9980000	9090	1097.91
	259	440	3128	UST	3570	3.19	1119.12
	260	450	3474	UST	4900	4.3	1139.53
	261	446	3405	UST	44000	37	1189.19
	262	439	3119	UST	110000000	91000	1208.79
	263	454	3557	UST	17000000	14000	1214.29
	264	446	3385	UST	31000	25	1240
	265	439	3121	UST	180000000	140000	1285.71
	266	465	3832	UST	55620	43	1293.49
	267	464	3801	UST	2588	2	1294
	268	438	3110	UST	13000000	10000	1300
	269	438	3111	UST	15000000	11000	1363.64
	270	466	3836	UST	6426	4.4	1460.45
	271	446	3376	UST	7000	4.6	1521.74
	272	431	3005	UST	73800	45	1640
	273	429	2993	UST	75500	45	1677.78
	274	420	2942	UST	456000	270	1688.89
	275	441	3150	UST	270000	140	1928.57
	276	474	6393	UST	397327	198	2006.7
	277	439	3118	UST	1700000	800	2125
	278	464	3802	UST	45480	20	2274
	279	446	3375	UST	28000	12	2333.33
	280	446	3417	UST	40000	17	2352.94
	281	450	3470	UST	65000	26	2500
	282	444	3223	UST	71700000	28000	2560.71
	283	444	3260	UST	7800	3	2600
	284	446	3382	UST	34000	13	2615.38
	285	444	3255	UST	29000	11	2636.36
	286	437	3104	Terminal	540000	200	2700
	287	452	3525	UST	2400	0.88	2727.27
	288	468	3857	UST	5700	2	2850
	289	450	3476	UST	13000	4.5	2888.89
	290	446	3384	UST	30000	10	3000
	291	450	3459	UST	70000	23	3043.48
	292	421	2947	UST	1130000	360	3138.89
	293	420	2945	UST	318000	100	3180
	294	607	9203	UST	1114550	350	3184.43
	295	446	3393	UST	29000	9.1	3186.81
	296	444	3363	UST	36000000	11000	3272.73
	297	446	3400	UST	40000	12	3333.33
	298	450	3462	UST	15000	4.2	3571.43
	299	468	3856	UST	10360	2.9	3572.41
	300	607	9205	UST	37800000	10000	3780
	301	450	3466	UST	1200000	310	3870.97
	302	446	3374	UST	28000	7.1	3943.66
	303	446	3416	UST	39000	9.7	4020.62
	304	450	3458	UST	53000	13	4076.92
	305	446	3404	UST	28000	6.8	4117.65
	306	446	3421	UST	41000	9.7	4226.8
	307	416	2910	UST	781000	182	4291.21
	308	444	3244	UST	879000	200	4395
	309	444	3311	UST	885000	200	4425
	310	441	3155	UST	27000	6.1	4426.23
	311	446	3422	UST	38000	8.3	4578.31
	312	465	3829	UST	31093000	6700	4640.75
	313	446	3381	UST	38000	8.1	4691.36
	314	454	3561	UST	8500000	1700	5000
	315	440	3129	UST	5290	1	5290
	316	429	2995	UST	248000	45	5511.11
	317	446	3372	UST	40000	7.1	5633.8
	318	446	3425	UST	30000	5.3	5660.38
	319	446	3395	UST	30000	5.1	5882.35
	320	436	3102	UST	490000	80	6125
	321	454	3559	UST	1300000	210	6190.48
	322	446	3391	UST	37000	5.4	6851.85
	323	426	2978	UST	354000	47.9	7390.4
	324	446	3408	UST	41000	5.5	7454.55
	325	446	3394	UST	28000	3.7	7567.57
	326	446	3392	UST	37000	4.7	7872.34
	327	446	3371	UST	36000	4.4	8181.82
	328	444	3258	UST	8700000	1000	8700
	329	444	3310	UST	106000	12	8833.33
	330	437	3105	Terminal	4500000	500	9000
	331	446	3403	UST	30000	3.3	9090.91
	332	446	3411	UST	30000	2.9	10344.8
	333	454	3560	UST	18000000	1700	10588.2
	334	446	3389	UST	61000	5.4	11296.3
	335	446	3383	UST	25000	2.1	11904.8
	336	446	3424	UST	28000	2.3	12173.9
	337	444	3314	UST	8800	0.7	12571.4
	338	446	3419	UST	34000	2.5	13600
	339	607	9204	UST	29200000	2000	14600
	340	446	3390	UST	44000	2.8	15714.3
	341	446	3420	UST	35000	2.1	16666.7
	342	436	3099	UST	74000	4.3	17209.3
	343	446	3407	UST	42000	2.4	17500
	344	474	6384	UST	179086	10	17908.6
	345	446	3379	UST	90000	4.9	18367.3
	346	436	3100	UST	20000000	1000	20000
	347	446	3370	UST	39000	1.9	20526.3
	348	446	3415	UST	110000	5.2	21153.8
	349	446	3380	UST	36000	1.6	22500
	350	474	6387	UST	67803000	3000	22601
	351	446	3406	UST	43000	1.9	22631.6
	352	446	3399	UST	98000	4.2	23333.3
	353	436	3103	UST	35000000	1300	26923.1
	354	446	3373	UST	27000	0.87	31034.5
	355	446	3409	UST	31000	0.85	36470.6
	356	446	3418	UST	39000	0.99	39393.9
	357	446	3423	UST	29000	0.68	42647.1
	358	452	3534	UST	12000	0.27	44444.4
	359	441	3154	UST	140000	2.7	51851.9
	360	418	2932	UST	5210	0.1	52100
	361	474	6386	UST	414354	5	82870.9
	362	417	2924	UST	10500	0.1	105000
	363	474	6385	UST	1731000	5	346200
	364	417	2922	UST	46900	0.1	469000	119

## Sheet: TPH-B Summary Stats
	Supplement (cont.): Summary of USEPA Petroleum Vapor Intrusion database samples for gasoline-only sites with TPH >1,000 µg/m3 [31].
	(Write-protection password: TPH)
	Total Sites:	48
	Total Samples:	364
	Median TPH:Benzene Ratio:	300.943
	Average TPH:Benzene Ratio:	5565.88
	TPH:Benzene Ratio	%Total Samples
	<90:1	0.217033
	>90:1 to <900:1	0.456044
	>900:1	0.326923
		1

## Sheet: Carbon Range Data
	Supplement (cont.): Summary of USEPA Petroleum Vapor Intrusion database samples for gasoline-only sites with TPH >1,000 µg/m3 [31].
	(Write-protection password: TPH)
	Sample Count	Site ID	Sample ID	Parameter	Soil Vapor µg/m3	Percent Composition	TPH:Benzene
	1	459	3775	Benzene	34
		459	3775	C5-C8 Aliphatic Hydrocarbons	3000	0.306122
		459	3775	C9-C10 Aromatic Hydrocarbons	2400	0.244898
		459	3775	C9-C12 Aliphatic Hydrocarbons	4400	0.44898
		459	3775	Total Petroleum Hydrocarbons	9800	1	288.235
	2	459	3777	Benzene	98
		459	3777	C5-C8 Aliphatic Hydrocarbons	1800	0.843091
		459	3777	C9-C10 Aromatic Hydrocarbons	55	0.0257611
		459	3777	C9-C12 Aliphatic Hydrocarbons	280	0.131148
		459	3777	Total Petroleum Hydrocarbons	2135	1	21.7857
	3	459	3778	Benzene	85000
		459	3778	C5-C8 Aliphatic Hydrocarbons	7400000	0.945083
		459	3778	C9-C10 Aromatic Hydrocarbons	160000	0.0204342
		459	3778	C9-C12 Aliphatic Hydrocarbons	270000	0.0344828
		459	3778	Total Petroleum Hydrocarbons	7830000	1	92.1176
	4	459	3780	Benzene	700
		459	3780	C5-C8 Aliphatic Hydrocarbons	19000	0.513514
		459	3780	C9-C10 Aromatic Hydrocarbons	12000	0.324324
		459	3780	C9-C12 Aliphatic Hydrocarbons	6000	0.162162
		459	3780	Total Petroleum Hydrocarbons	37000	1	52.8571
	5	460	3782	Benzene	24
		460	3782	C5-C8 Aliphatic Hydrocarbons	13000	0.996933
		460	3782	C9-C10 Aromatic Hydrocarbons	20	0.00153374
		460	3782	C9-C12 Aliphatic Hydrocarbons	20	0.00153374
		460	3782	Total Petroleum Hydrocarbons	13040	1	543.333
	6	460	3783	Benzene	4
		460	3783	C5-C8 Aliphatic Hydrocarbons	1800	0.869565
		460	3783	C9-C10 Aromatic Hydrocarbons	100	0.0483092
		460	3783	C9-C12 Aliphatic Hydrocarbons	170	0.0821256
		460	3783	Total Petroleum Hydrocarbons	2070	1	517.5
	7	461	3787	Benzene	14
		461	3787	C5-C8 Aliphatic Hydrocarbons	1300	0.862069
		461	3787	C9-C10 Aromatic Hydrocarbons	28	0.0185676
		461	3787	C9-C12 Aliphatic Hydrocarbons	180	0.119363
		461	3787	Total Petroleum Hydrocarbons	1508	1	107.714
	8	461	3788	Benzene	55
		461	3788	C5-C8 Aliphatic Hydrocarbons	3300	0.906593
		461	3788	C9-C10 Aromatic Hydrocarbons	100	0.0274725
		461	3788	C9-C12 Aliphatic Hydrocarbons	240	0.0659341
		461	3788	Total Petroleum Hydrocarbons	3640	1	66.1818
	9	461	3789	Benzene	34
		461	3789	C5-C8 Aliphatic Hydrocarbons	990	0.804878
		461	3789	C9-C10 Aromatic Hydrocarbons	100	0.0813008
		461	3789	C9-C12 Aliphatic Hydrocarbons	140	0.113821
		461	3789	Total Petroleum Hydrocarbons	1230	1	36.1765
	10	461	3790	Benzene	25
		461	3790	C5-C8 Aliphatic Hydrocarbons	1200	0.91954
		461	3790	C9-C10 Aromatic Hydrocarbons	23	0.0176245
		461	3790	C9-C12 Aliphatic Hydrocarbons	82	0.0628352
		461	3790	Total Petroleum Hydrocarbons	1305	1	52.2
	11	463	3796	Benzene	6.9
		463	3796	C5-C8 Aliphatic Hydrocarbons	610	0.54955
		463	3796	C9-C10 Aromatic Hydrocarbons	120	0.108108
		463	3796	C9-C12 Aliphatic Hydrocarbons	380	0.342342
		463	3796	Total Petroleum Hydrocarbons	1110	1	160.87
	12	464	3801	Benzene	2
		464	3801	C5-C8 Aliphatic Hydrocarbons	530	0.204791
		464	3801	C9-C10 Aromatic Hydrocarbons	58	0.0224111
		464	3801	C9-C12 Aliphatic Hydrocarbons	2000	0.772798
		464	3801	Total Petroleum Hydrocarbons	2588	1	1294
	13	464	3802	Benzene	20
		464	3802	C5-C8 Aliphatic Hydrocarbons	45000	0.989446
		464	3802	C9-C10 Aromatic Hydrocarbons	100	0.00219877
		464	3802	C9-C12 Aliphatic Hydrocarbons	380	0.00835532
		464	3802	Total Petroleum Hydrocarbons	45480	1	2274
	14	464	3807	Benzene	2
		464	3807	C5-C8 Aliphatic Hydrocarbons	890	0.876847
		464	3807	C9-C10 Aromatic Hydrocarbons	15	0.0147783
		464	3807	C9-C12 Aliphatic Hydrocarbons	110	0.108374
		464	3807	Total Petroleum Hydrocarbons	1015	1	507.5
	15	464	3815	Benzene	2
		464	3815	C5-C8 Aliphatic Hydrocarbons	270	0.123853
		464	3815	C9-C10 Aromatic Hydrocarbons	1200	0.550459
		464	3815	C9-C12 Aliphatic Hydrocarbons	710	0.325688
		464	3815	Total Petroleum Hydrocarbons	2180	1	1090
	16	464	3816	Benzene	2
		464	3816	C5-C8 Aliphatic Hydrocarbons	1400	0.694444
		464	3816	C9-C10 Aromatic Hydrocarbons	56	0.0277778
		464	3816	C9-C12 Aliphatic Hydrocarbons	560	0.277778
		464	3816	Total Petroleum Hydrocarbons	2016	1	1008
	17	464	3824	Benzene	20
		464	3824	C5-C8 Aliphatic Hydrocarbons	16000	0.985222
		464	3824	C9-C10 Aromatic Hydrocarbons	100	0.00615764
		464	3824	C9-C12 Aliphatic Hydrocarbons	140	0.00862069
		464	3824	Total Petroleum Hydrocarbons	16240	1	812
	18	465	3827	Benzene	70000
		465	3827	C5-C8 Aliphatic Hydrocarbons	24000000	0.892193
		465	3827	C9-C10 Aromatic Hydrocarbons	100000	0.00371747
		465	3827	C9-C12 Aliphatic Hydrocarbons	2800000	0.104089
		465	3827	Total Petroleum Hydrocarbons	26900000	1	384.286
	19	465	3828	Benzene	20000
		465	3828	C5-C8 Aliphatic Hydrocarbons	4500000	0.912909
		465	3828	C9-C10 Aromatic Hydrocarbons	9300	0.00188668
		465	3828	C9-C12 Aliphatic Hydrocarbons	420000	0.0852048
		465	3828	Total Petroleum Hydrocarbons	4929300	1	246.465
	20	465	3829	Benzene	6700
		465	3829	C5-C8 Aliphatic Hydrocarbons	31000000	0.997009
		465	3829	C9-C10 Aromatic Hydrocarbons	21000	0.000675393
		465	3829	C9-C12 Aliphatic Hydrocarbons	72000	0.00231563
		465	3829	Total Petroleum Hydrocarbons	31093000	1	4640.75
	21	465	3831	Benzene	2900
		465	3831	C5-C8 Aliphatic Hydrocarbons	41000	0.854345
		465	3831	C9-C10 Aromatic Hydrocarbons	290	0.00604293
		465	3831	C9-C12 Aliphatic Hydrocarbons	6700	0.139612
		465	3831	Total Petroleum Hydrocarbons	47990	1	16.5483
	22	465	3832	Benzene	43
		465	3832	C5-C8 Aliphatic Hydrocarbons	52000	0.934915
		465	3832	C9-C10 Aromatic Hydrocarbons	420	0.00755124
		465	3832	C9-C12 Aliphatic Hydrocarbons	3200	0.0575333
		465	3832	Total Petroleum Hydrocarbons	55620	1	1293.49
	23	465	3833	Benzene	4400
		465	3833	C5-C8 Aliphatic Hydrocarbons	1200000	0.957702
		465	3833	C9-C10 Aromatic Hydrocarbons	22000	0.0175579
		465	3833	C9-C12 Aliphatic Hydrocarbons	31000	0.0247406
		465	3833	Total Petroleum Hydrocarbons	1253000	1	284.773
	24	466	3836	Benzene	4.4
		466	3836	C5-C8 Aliphatic Hydrocarbons	4400	0.684718
		466	3836	C9-C10 Aromatic Hydrocarbons	26	0.00404606
		466	3836	C9-C12 Aliphatic Hydrocarbons	2000	0.311236
		466	3836	Total Petroleum Hydrocarbons	6426	1	1460.45
	25	466	3837	Benzene	44
		466	3837	C5-C8 Aliphatic Hydrocarbons	1000	0.653595
		466	3837	C9-C10 Aromatic Hydrocarbons	220	0.143791
		466	3837	C9-C12 Aliphatic Hydrocarbons	310	0.202614
		466	3837	Total Petroleum Hydrocarbons	1530	1	34.7727
	26	467	3842	Benzene	1300
		467	3842	C5-C8 Aliphatic Hydrocarbons	2100	0.190909
		467	3842	C9-C10 Aromatic Hydrocarbons	4850	0.440909
		467	3842	C9-C12 Aliphatic Hydrocarbons	4050	0.368182
		467	3842	Total Petroleum Hydrocarbons	11000	1	8.46154
	27	467	3843	Benzene	480
		467	3843	C5-C8 Aliphatic Hydrocarbons	34000	0.960452
		467	3843	C9-C10 Aromatic Hydrocarbons	560	0.0158192
		467	3843	C9-C12 Aliphatic Hydrocarbons	840	0.0237288
		467	3843	Total Petroleum Hydrocarbons	35400	1	73.75
	28	467	3844	Benzene	3200
		467	3844	C5-C8 Aliphatic Hydrocarbons	150000	0.919681
		467	3844	C9-C10 Aromatic Hydrocarbons	3900	0.0239117
		467	3844	C9-C12 Aliphatic Hydrocarbons	9200	0.0564071
		467	3844	Total Petroleum Hydrocarbons	163100	1	50.9688
	29	467	3845	Benzene	110000
		467	3845	C5-C8 Aliphatic Hydrocarbons	3000000	0.968679
		467	3845	C9-C10 Aromatic Hydrocarbons	61000	0.0196965
		467	3845	C9-C12 Aliphatic Hydrocarbons	36000	0.0116242
		467	3845	Total Petroleum Hydrocarbons	3097000	1	28.1545
	30	467	3848	Benzene	200
		467	3848	C5-C8 Aliphatic Hydrocarbons	6200	0.886981
		467	3848	C9-C10 Aromatic Hydrocarbons	250	0.0357654
		467	3848	C9-C12 Aliphatic Hydrocarbons	540	0.0772532
		467	3848	Total Petroleum Hydrocarbons	6990	1	34.95
	31	468	3856	Benzene	2.9
		468	3856	C5-C8 Aliphatic Hydrocarbons	9700	0.936293
		468	3856	C9-C10 Aromatic Hydrocarbons	300	0.0289575
		468	3856	C9-C12 Aliphatic Hydrocarbons	360	0.034749
		468	3856	Total Petroleum Hydrocarbons	10360	1	3572.41
	32	468	3857	Benzene	2
		468	3857	C5-C8 Aliphatic Hydrocarbons	4300	0.754386
		468	3857	C9-C10 Aromatic Hydrocarbons	100	0.0175439
		468	3857	C9-C12 Aliphatic Hydrocarbons	1300	0.22807
		468	3857	Total Petroleum Hydrocarbons	5700	1	2850
	33	469	3861	Benzene	7.9
		469	3861	C5-C8 Aliphatic Hydrocarbons	5100	0.982659
		469	3861	C9-C10 Aromatic Hydrocarbons	25	0.00481696
		469	3861	C9-C12 Aliphatic Hydrocarbons	65	0.0125241
		469	3861	Total Petroleum Hydrocarbons	5190	1	656.962
	34	469	3863	Benzene	8
		469	3863	C5-C8 Aliphatic Hydrocarbons	1000	0.73046
		469	3863	C9-C10 Aromatic Hydrocarbons	99	0.0723156
		469	3863	C9-C12 Aliphatic Hydrocarbons	270	0.197224
		469	3863	Total Petroleum Hydrocarbons	1369	1	171.125
	35	469	3864	Benzene	6.5
		469	3864	C5-C8 Aliphatic Hydrocarbons	900	0.461538
		469	3864	C9-C10 Aromatic Hydrocarbons	300	0.153846
		469	3864	C9-C12 Aliphatic Hydrocarbons	750	0.384615
		469	3864	Total Petroleum Hydrocarbons	1950	1	300

## Sheet: Carbon Range Summary Stats
	Supplement (cont.): Summary of USEPA Petroleum Vapor Intrusion database samples for gasoline-only sites with TPH >1,000 µg/m3 [31].
	(Write-protection password: TPH)
	Carbon Range	Average	RfC (µg/m3)
	C5-C8 Aliphatic Hydrocarbons	0.773456	600
	C9-C12 Aliphatic Hydrocarbons	0.0725991	100
	C9-C10 Aromatic Hydrocarbons	0.153945	100
		Weighted RfC:	281.331
	Example Indoor Air Screening Levels	µg/m3
	Weighted TPH (HQ=1):	290
	Benzene Indoor Air (ECR=10-6):	0.31
	TPH:Benzene Critical Ratio:	935.484
